# Supplementary material
Source: Springer Nature journal article supplement (https://www.springermedizin.de/resource/supplementary/12913_2009_1071_MOESM4_ESM.pdf/9536270)

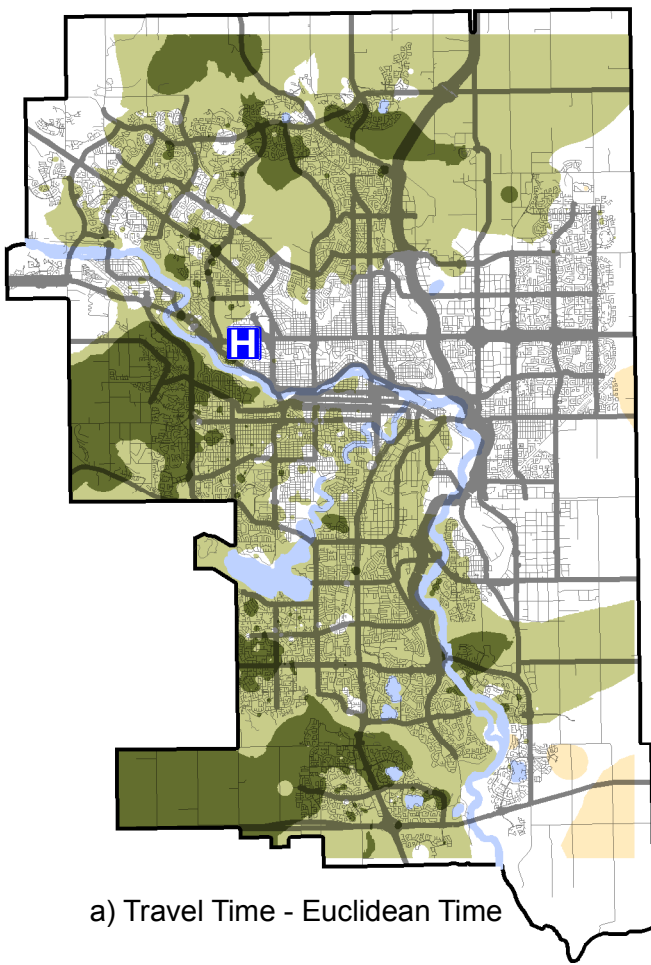

a) Travel Time - Euclidean Time

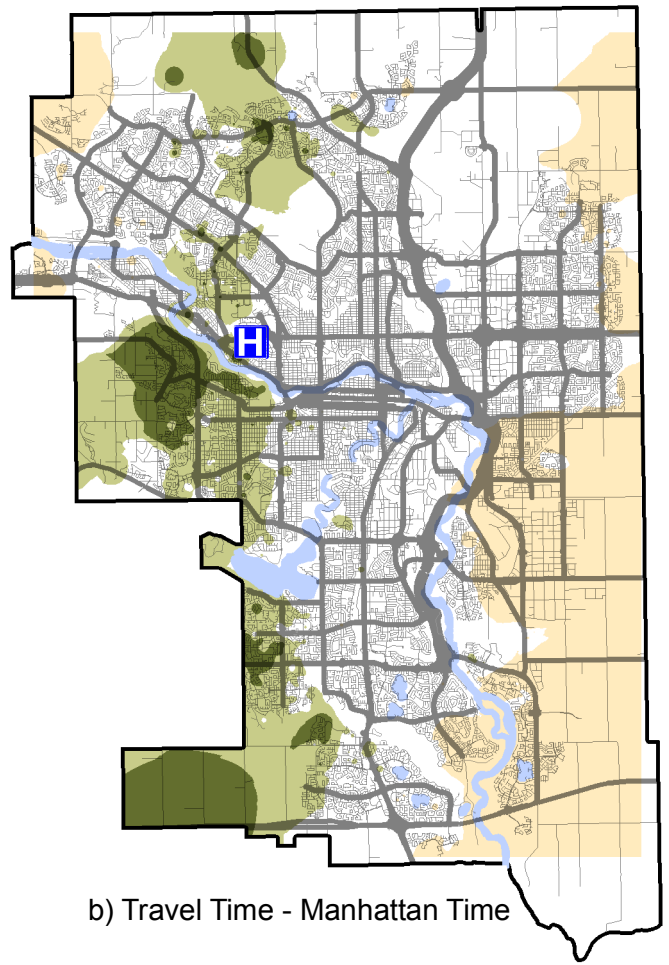

b) Travel Time - Manhattan Time

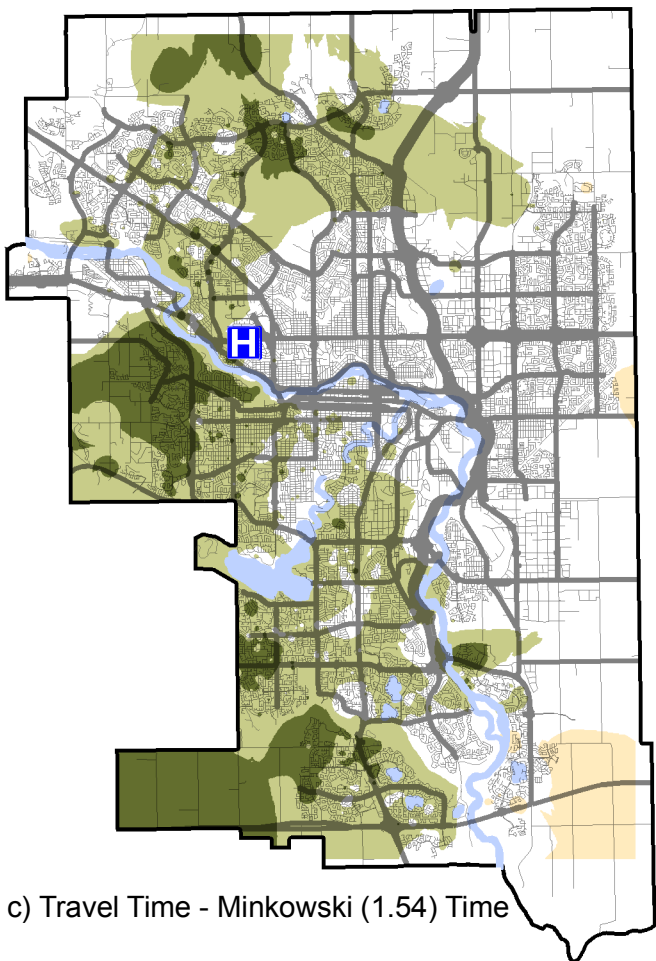

c) Travel Time - Minkowski (1.54) Time

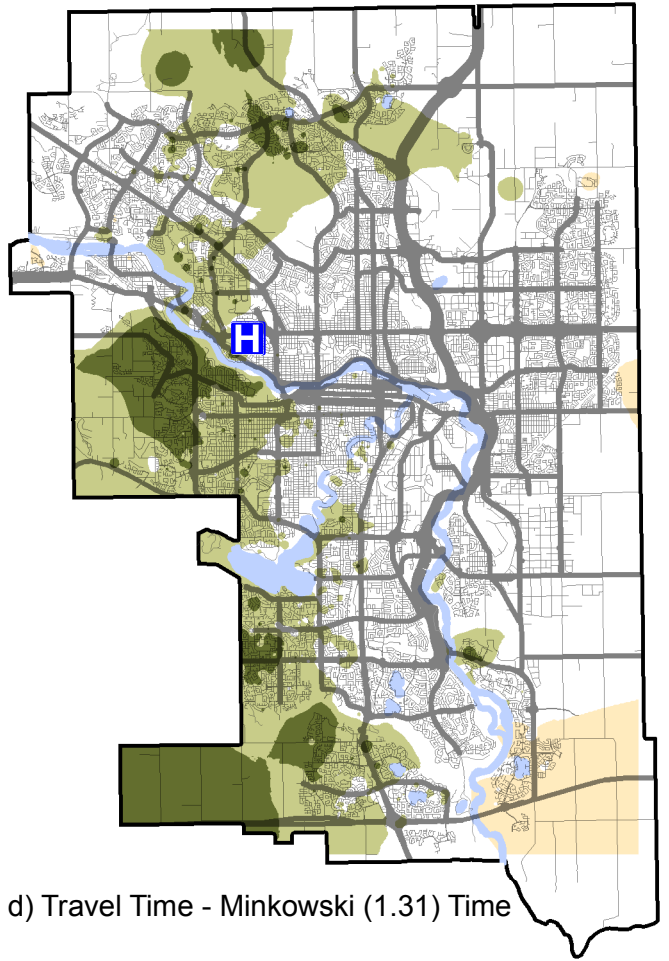

d) Travel Time - Minkowski (1.31) Time

**Metric estimate error**

-  < -2.5 Km.
-  -2.5 - 2.5 Km.
-  2.5 - 5 Km.
-  > 5 Km.

 **Foothills Medical Centre**

0 4.5 9 18 Kilometers

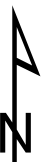

Supplement: MOESM4 [file 9536270]
